# Supplementary material for: Multifunctional sponge scaffold loaded with concentrated growth factors for promoting wound healing
Source: PubMed Central journal article supplement — iScience. 2022 Dec 20;26(1):105835. doi: 10.1016/j.isci.2022.105835 (PMC9823238; doi:10.1016/j.isci.2022.105835), 2022-12-20
Supplement: mmc1.pdf [file mmc1.pdf]

iScience, Volume 26

## **Supplemental information**

### **Multifunctional sponge scaffold loaded with concentrated growth factors for promoting wound healing**

**Lianglong Chen, Chaoyang Huang, Yu Zhong, Yujia Chen, Huihui Zhang, Zijun Zheng, Ziwei Jiang, Xuerong Wei, Yujie Peng, Lei Huang, Libin Niu, Yanbin Gao, Jun Ma, and Lei Yang**

## **Supporting information:**

### **Multifunctional sponge scaffold loaded with concentrated growth factors for promoting wound healing**

Lianglong Chen<sup>a, 1</sup>, Chaoyang Huang<sup>a, 1</sup>, Yu Zhong<sup>a, 1</sup>, Yujia Chen<sup>a</sup>, Huihui Zhang<sup>a</sup>, Zijun Zheng<sup>a</sup>, Ziwei Jiang<sup>a</sup>, Xuerong Wei<sup>a</sup>, Yujie Peng<sup>a</sup>, Lei Huang<sup>a</sup>, Libin Niu<sup>a</sup>, Yanbin Gao<sup>a, 2</sup>, Jun Ma<sup>a, 2</sup>, Lei Yang<sup>a, 2,\*</sup>

<sup>a</sup> Department of Burns, Nanfang Hospital, Southern Medical University; Jingxi Street, Baiyun

1 These authors contributed equally to this work.

2 These authors are co-corresponding authors.

#### **\* Lead Contact Correspondence:**

Professor Lei Yang (M.D. & Ph.D.), Department of Burns, Nanfang Hospital, Southern Medical University; Jingxi Street, Baiyun District, Guangzhou, 510515, P.R. China. E-mail: yuanyang@smu.edu.cn (L. Yang); Tel: +86 -020-6164-1841.

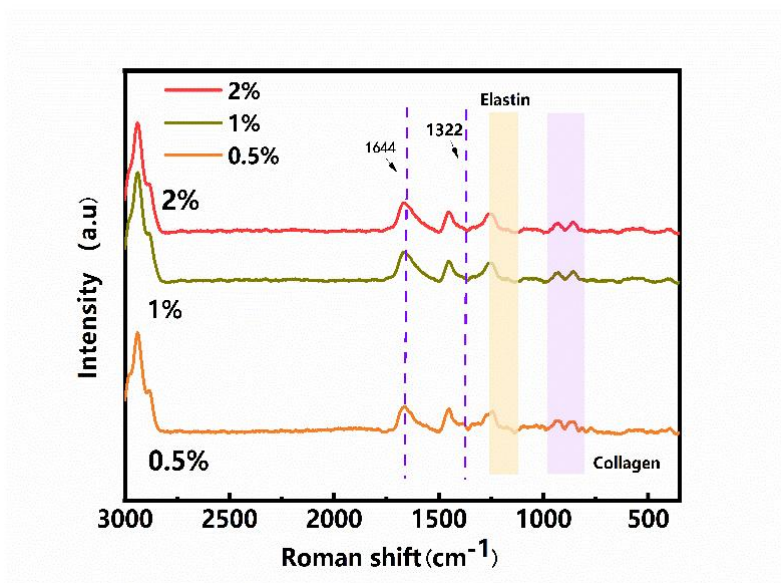

**Figure S1. Raman spectrochemical structure analysis of PADM gel prepared under different concentrations of acetic acid, Related to Figure 2.**

the material' s Raman spectrum, where the peak intensities of proline (near 856  $\text{cm}^{-1}$ ) and shows the peak intensities of proline (near 856  $\text{cm}^{-1}$ ) and elastin (near 1126  $\text{cm}^{-1}$ ) $\text{m}^{-1}$ , respectively.

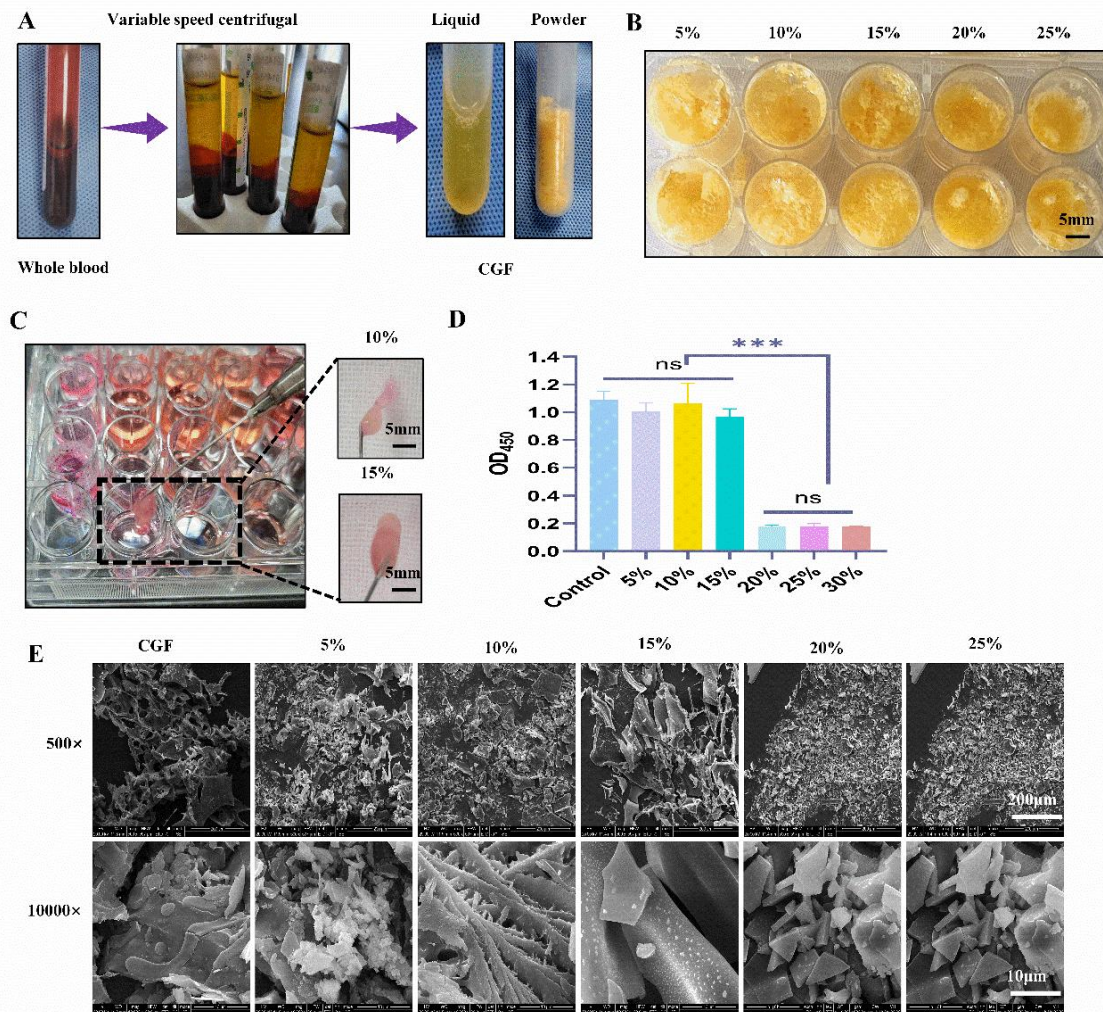

**Figure S2. Preparation and characterization of potent growth factor (CGF), Related to STAR Methods.**

(A) Variable speed centrifugation to extract liquid concentration of growth factors from venous blood. the CGF fibrin solution prepared by variable speed centrifuge is also a light yellow liquid, which does not change significantly when standing at room temperature; (B) Physical images after freeze-drying with different concentrations of CGF. CGF with varying concentrations exhibited a loose, porous and spongy structure with a brittle texture; (C) Morphology of CGF with different concentrations at 37°C. When CGF with varying concentrations was incubated at 37 °C for 24 h, the 10% and 15% CGF formed gel; (D) Determination of cytotoxicity of CGF at different concentrations by CCK-8. CGF concentrations below 15% had no significant effect on cell proliferation, while CGF concentrations above 15% inhibited cell activity; (E) Microstructure images of CGF scanning at different concentrations. CGF with varying concentrations had a particular three-dimensional fiber network structure and fragile texture.

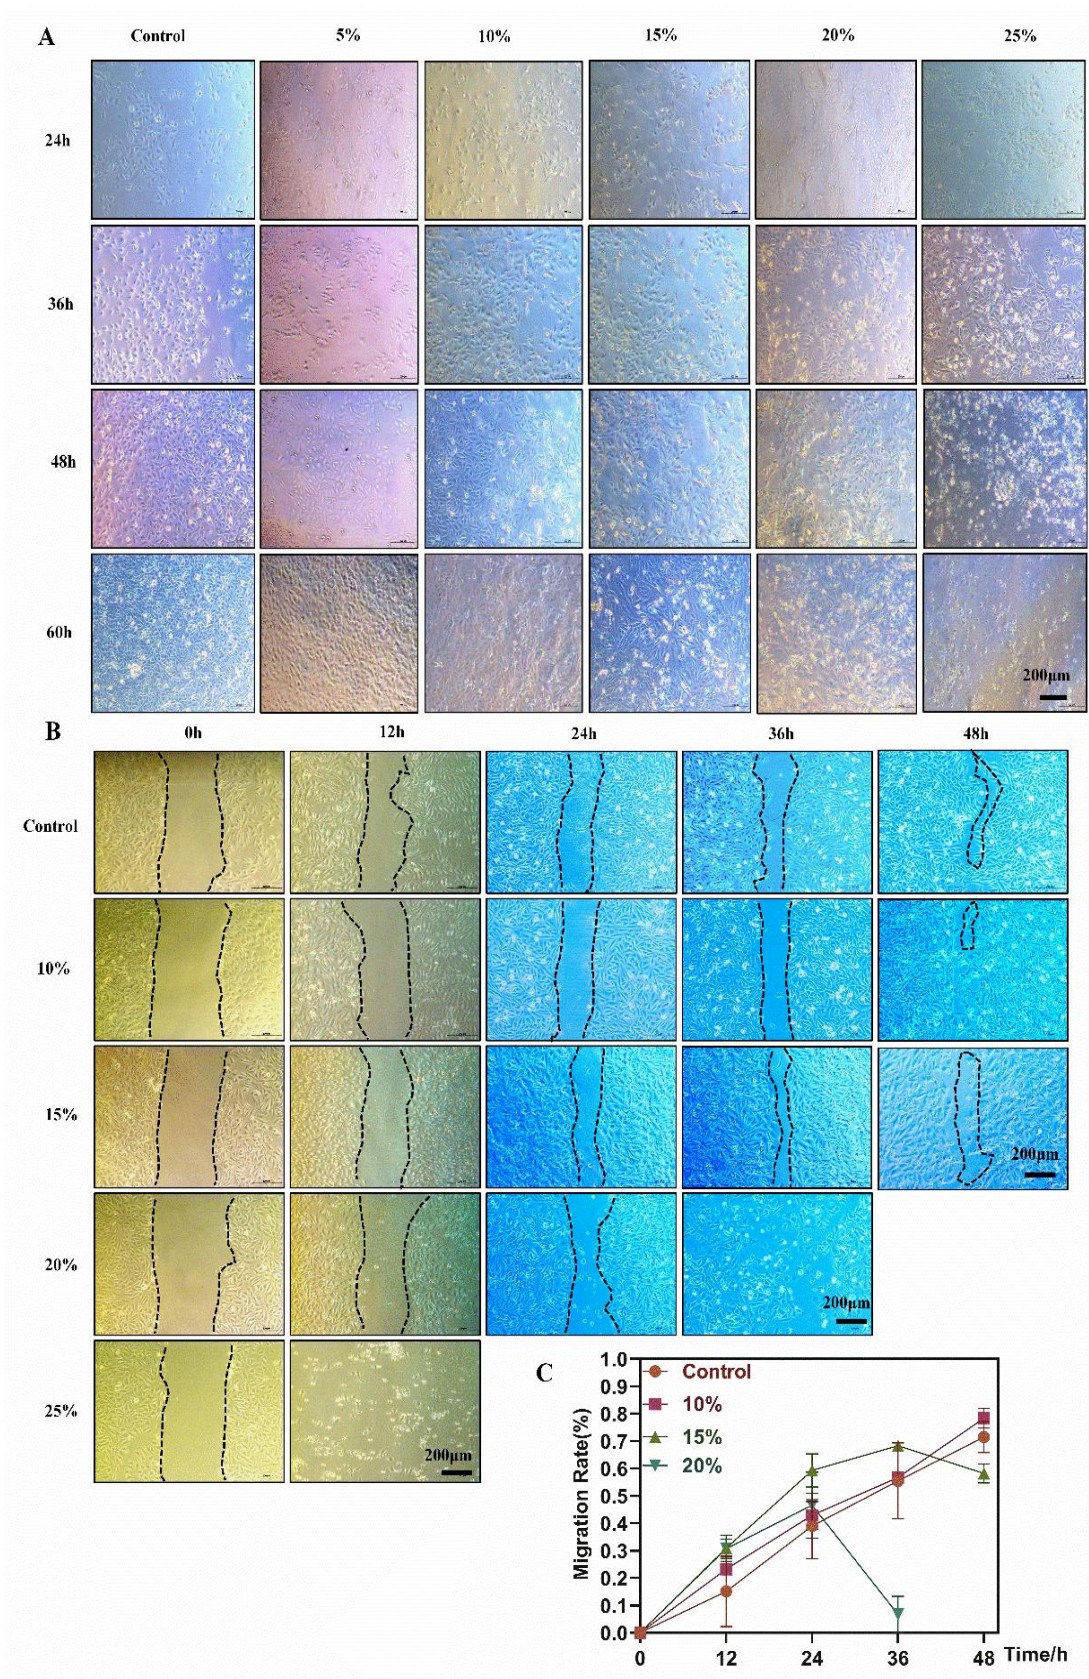

**Figure S3. Evaluation of CGF at the cellular level in vitro, Related to STAR Methods.**

(A) Morphology of L929 cells cultured with different concentrations of CGF. the CGF

solution with a concentration below 20% could function as a 10% complete medium to maintain cell growth. However, CGF at concentrations above 20% could not support cell growth from 48 h; (B) Cell migration assay to evaluate the effect of different concentrations of CGF on L929 cell migration. The cell migration experiment further optimized the concentration of CGF and found that 15% CGF achieved the best performance in promoting cell migration at 36 h. The 10% CGF continued to encourage cell migration for 48 h until the cells were in contact; (C) Statistical quantification of cell mobility. 10% CGF achieved the best mobility at 48h, followed by the control and then the 15% CGF (\*P<0.05, \*\*P<0.01).

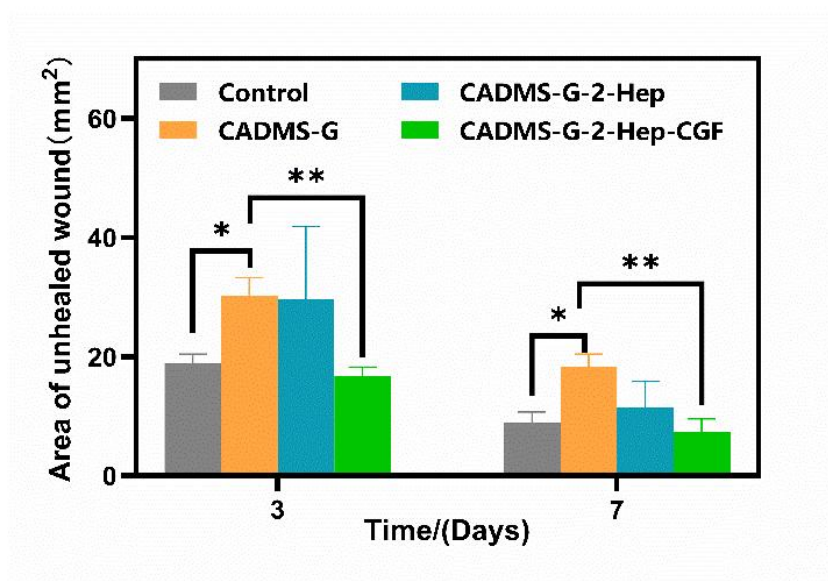

**Figure S4. Statistical quantitative analysis of unhealed skin grafts, Related to Figure 9.**

On the 7th day, the residual unhealed skin graft areas of control, CADMS-G, CADMS-G-2-Hep, and CADMS-G-2-Hep-CGF were  $9.64 \pm 2.8 \text{ mm}^2$ ,  $18.28 \pm 2.16 \text{ mm}^2$ ,  $11.57 \pm 4.29 \text{ mm}^2$ , and  $6.05 \pm 3.14 \text{ mm}^2$ , respectively. (\*P<0.05, \*\*P<0.01).
